# Supplementary material for: Optimization of a siRNA Carrier Modified with a pH-Sensitive Cationic Lipid and a Cyclic RGD Peptide for Efficiently Targeting Tumor Endothelial Cells
Source: Pharmaceutics. 2015 Sep 14;7(3):320–33. doi: 10.3390/pharmaceutics7030320 (PMC4588203; doi:10.3390/pharmaceutics7030320)
Supplement: Supplementary File 1 [file pharmaceutics-07-00320-s001.pdf]

# Supplementary Materials

**Table S1.** The sequences of oligonucleotides used in this study.

| Name          |           | Sequence (5' to 3')             |
|---------------|-----------|---------------------------------|
| siRNA         |           |                                 |
| <i>PLK1</i>   | sense     | aga u*ca ccc u*cc uu*a aau* auu |
|               | antisense | uau uua ag*g agg gug au*c uuu   |
| <i>Cd31</i>   | sense     | gug cau agu uca agu gac aTT     |
|               | antisense | ugu cac uug aac uau gca cTT     |
| <i>Vegfr2</i> | sense     | cca gug gac gga uga uca aTT     |
|               | antisense | uug auc auc cgu cca cug gTT     |
| primer        |           |                                 |
| <i>PLK1</i>   | forward   | CTC CTT GAT GAA GAA GAT CAC C   |
|               | reverse   | GAA GAA GTT GAT CTG CAC GC      |
| <i>GAPDH</i>  | forward   | CCT CTG ACT TCA ACA GCG AC      |
|               | reverse   | CGT TGT CAT ACC AGG AAA TGA G   |
| <i>Cd31</i>   | forward   | TAC AGT GGA CAC TAC ACC TG      |
|               | reverse   | GAC TGG AGG AGA ACT CTAAC       |
| <i>Vegfr2</i> | forward   | GAT TTC ACC TGG CAC TCT C       |
|               | reverse   | CTT GGT CAC TCT TGG TCA C       |
| <i>Actb</i>   | forward   | GAA GGA GAT TAC TGC TCT GG      |
|               | reverse   | ACA CAG AGT ACT TGC GCT CA      |

upper case, DNA; lower case, RNA; \*, 2'-OMe modification.

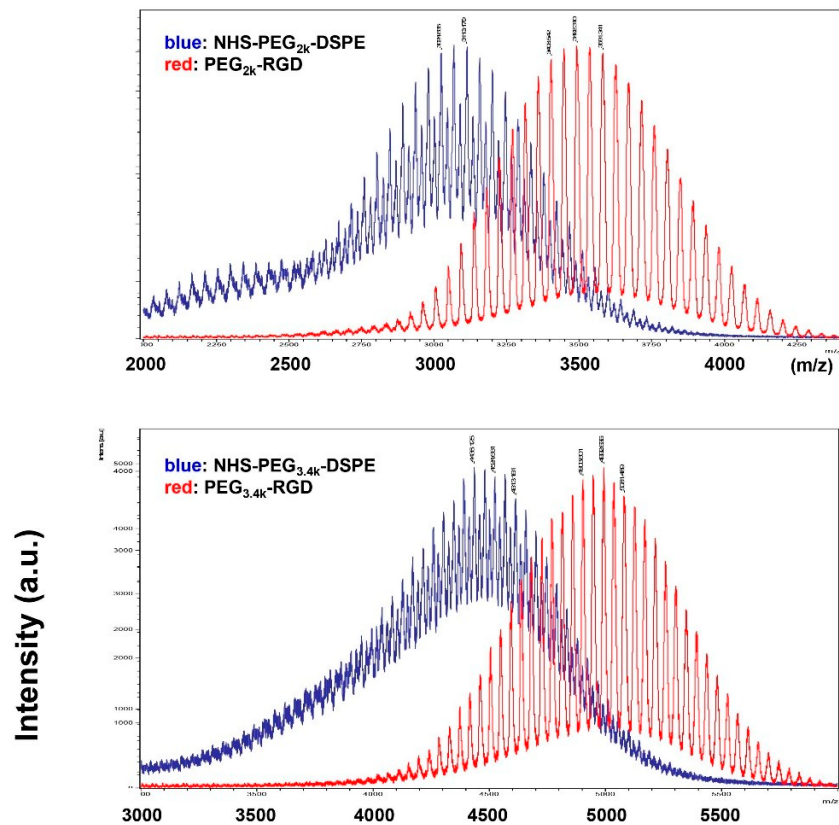

**Figure S1.** Cont.

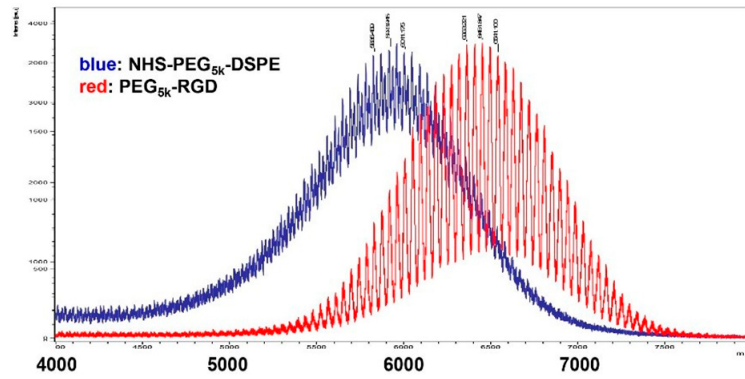

**Figure S1.** The mass spectrum of RGD PEG-lipids. Purified RGD PEG-lipids were subjected to matrix assisted laser desorption ionization time-of-flight mass spectrometry (MALDI TOF-MS).

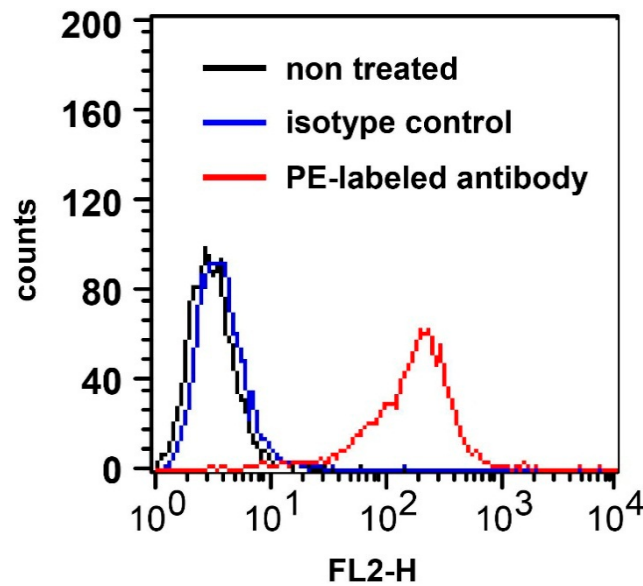

**Figure S2.** The  $\alpha v \beta 3$  integrin expression of OS-RC-2 cells. To measure protein expression,  $1.0 \times 10^5$  trypsinized cells were treated with 1  $\mu$ g of PE-labeled antibody on ice. Then, cells were analyzed by flow cytometry, FACSCalibur (Becton Dickinson). Black, blue and red lines means, non-treated cells, cells treated with isotype control antibody and cells treated with PE-labeled antibody against  $\alpha v \beta 3$  integrin, respectively.

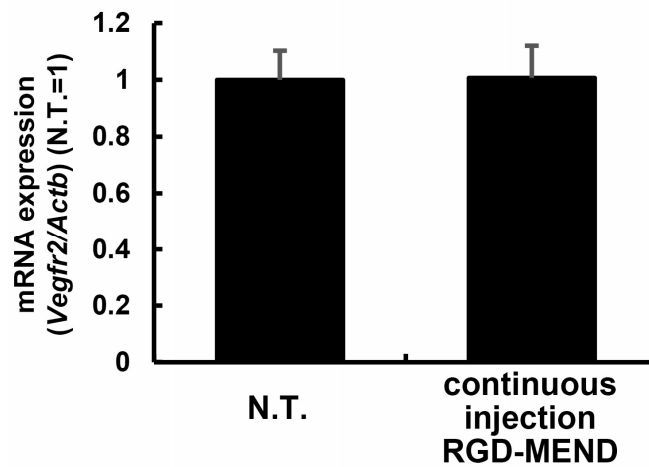

**Figure S3.** The gene silencing 1 week after the injection. The optimized RGD-modified MEND<sub>in vivo</sub> was administered into mice via the tail vein 3 times every a day, and then 1 week after the third administration *Vegfr2* mRNA level was determined by qRT-PCR.

© 2015 by the authors; licensee MDPI, Basel, Switzerland. This article is an open access article distributed under the terms and conditions of the Creative Commons Attribution license (<http://creativecommons.org/licenses/by/4.0/>).
